# Supplementary material
Source: PubMed Central journal article supplement (PMC1544083)

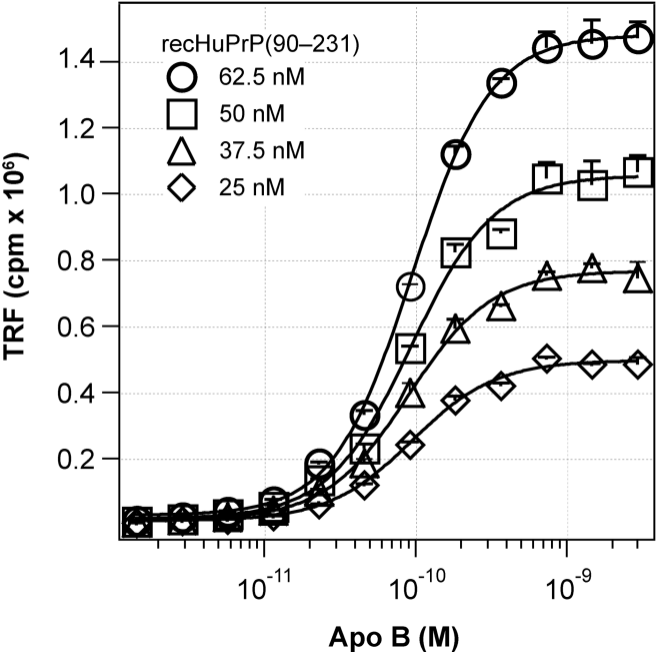

Supplement: pnas_0604021103_2.pdf [file pnas_0604021103_2.pdf]
